# Supplementary material for: Complex electrochemiluminescence patterns shaped by hydrodynamics at a rotating bipolar electrode
Source: PubMed Central journal article supplement — Chem Sci. 2024 May 21;15(23):8723–30. doi: 10.1039/d4sc02528h (PMC11168095; doi:10.1039/d4sc02528h), 2024-05-21
Supplement: SC-015-D4SC02528H-s001.pdf [file SC-015-D4SC02528H-s001.pdf]

## Electronic supplementary information

### Complex electrochemiluminescence patterns shaped by the hydrodynamics at a rotating bipolar electrode

Leslie R. Arias-Aranda,<sup>1</sup> Gerardo Salinas,<sup>1</sup> Alexander Kuhn,<sup>1</sup> Guobao Xu,<sup>2,3</sup> Frédéric Kanoufi,<sup>4</sup> Laurent Bouffier\*<sup>1</sup>, Neso Sojic\*<sup>1</sup>

<sup>1</sup> Univ. Bordeaux, CNRS, Bordeaux INP, ISM, UMR 5255, F-33607 Pessac, France

<sup>2</sup> State Key Laboratory of Electroanalytical Chemistry, Changchun Institute of Applied Chemistry, Chinese Academy of Sciences, Changchun, Jilin 130022, P. R. China

<sup>3</sup> School of Applied Chemistry and Engineering, University of Science and Technology of China, No. 96 Jinzhai Road, Hefei, Anhui, 230026, P. R. China

<sup>4</sup> Université Paris Cité, CNRS, ITODYS, UMR 7086, 75013 Paris, France

#### Table of Contents

**Figure S1.** Optical images of the ECL emission at different rotation speeds of the DRBPE.

**Figure S2.** Optical images of the ECL emitted by the classic RDE in a 3-electrode configuration

**Figure S3.** Integrated ECL intensity and full width at half maximum of the ECL intensity profiles where ECL intensity was maximum as function of the rotation speed  $\omega$ .

**Figure S4.** ECL images of the RDBPE at different rotation speeds  $\omega$ .

**Figure S5.** ECL images of the RDBPE at different rotation speeds  $\omega$  without TPA in solution.

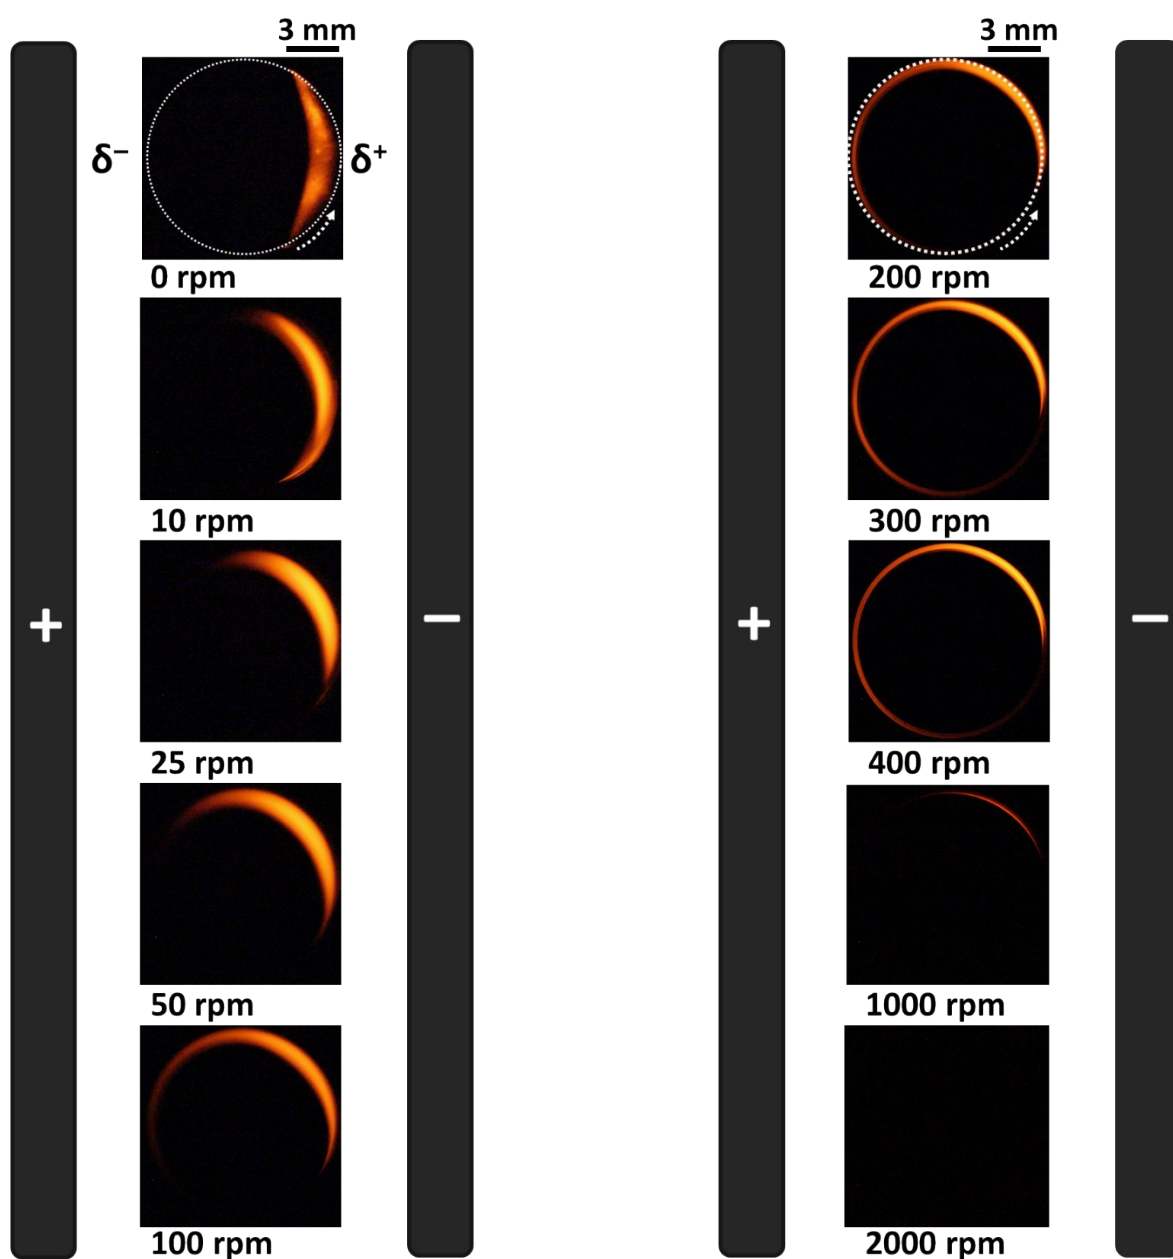

**Figure S1.** Optical images of the ECL emission at different rotation speeds (indicated in the figure) of the RDBPE. A constant electric field of 8.3 V/cm was imposed by the two graphite feeder electrodes schematized at both extremities. Experiments were performed in a PBS (10 mM, pH 7.4) solution containing 0.1 mM  $[\text{Ru}(\text{bpy})_3]^{2+}$  and 0.25 mM TPA.

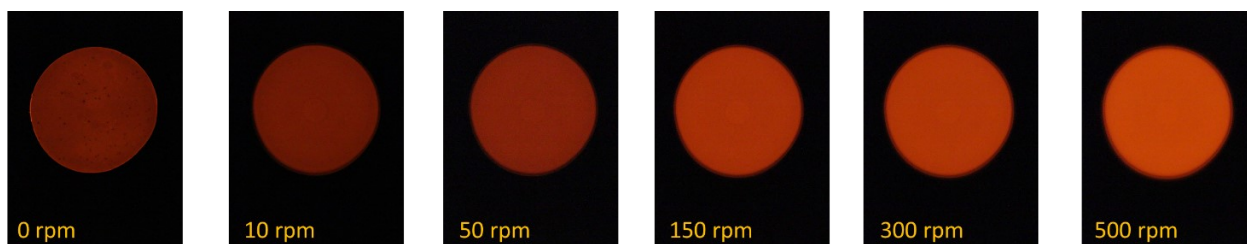

**Figure S2.** Optical images of the ECL emitted by a classic RDE in a 3-electrode configuration (i.e. not in bipolar electrochemistry mode) in 10 mM PBS (pH 7.4) containing 0.1 mM  $[\text{Ru}(\text{bpy})_3]^{2+}$  and 0.25 mM TPA at different rotation speeds. Potential scan range: 0.6 to 1.5 V vs. Ag/AgCl. Scan rate:  $0.1 \text{ V s}^{-1}$ . Each image is accumulated during the whole duration of the corresponding cyclic voltammetry experiment (i.e. acquisition time of 18 s).

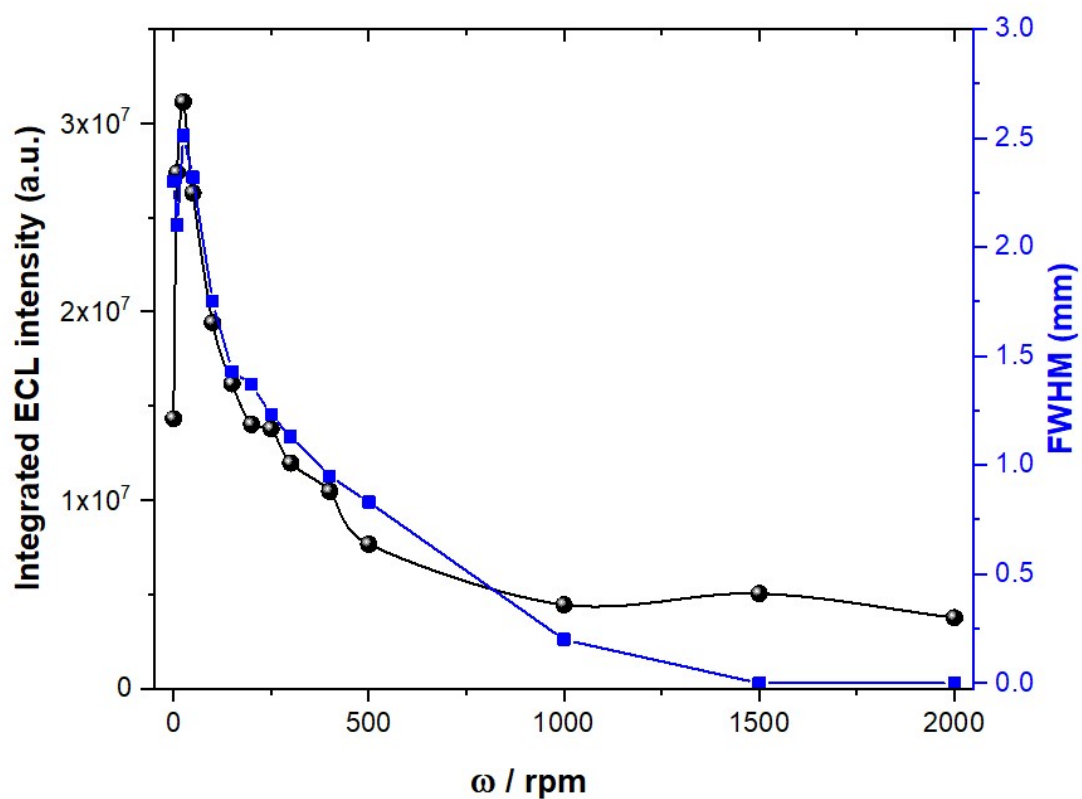

**Figure S3.** Integrated ECL intensity (black dots) and full width at half maximum (FWHM, blue squares) of the ECL intensity profiles where ECL intensity was maximum as a function of the rotation speed  $\omega$ . Same experimental conditions as in Figure S1.

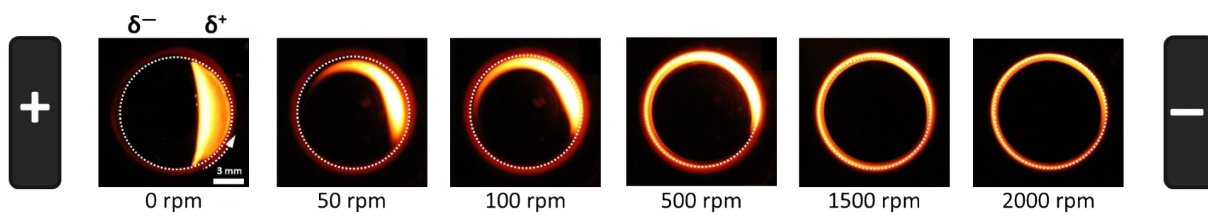

**Figure S4.** ECL images of the RDBPE at different rotation speeds  $\omega$ . Experiments were performed in a PBS (10 mM, pH 7.4) solution containing 2 mM  $[\text{Ru}(\text{bpy})_3]^{2+}$  and 5 mM TPA. The dotted white circle and the dotted arrow indicate the position of the RDBPE and the direction of the rotation, respectively. A constant electric field of 8.3 V/cm was imposed by the two graphite feeder electrodes schematized at both extremities. Exposure time: 8 s.

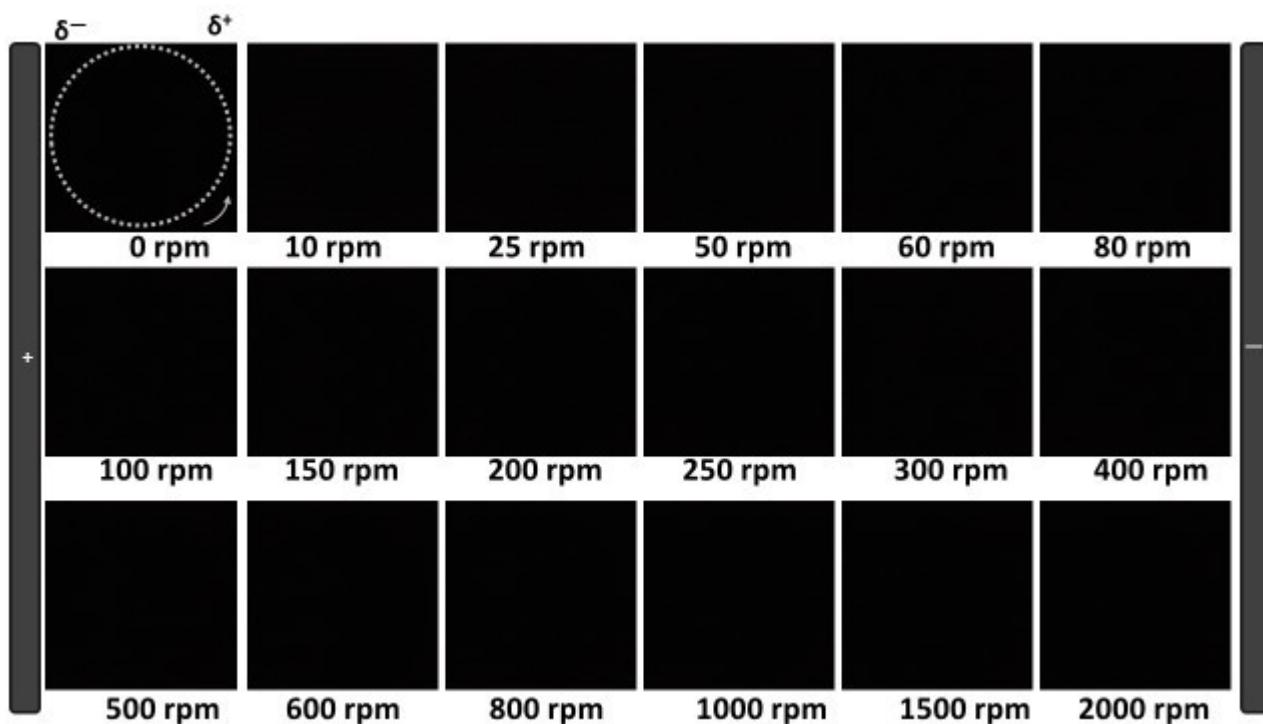

**Figure S5.** Effect of absence of TPA co-reactant on the ECL images of the RDBPE at different rotation speeds  $\omega$ . Experiments were performed in a PBS (10 mM, pH 7.4) solution containing 2 mM  $[\text{Ru}(\text{bpy})_3]^{2+}$  without TPA. The dotted white circle and the dotted arrow indicate the position of the RDBPE and the direction of the rotation, respectively. A constant electric field of  $8.3 \text{ V cm}^{-1}$  was imposed by the two graphite feeder electrodes schematized at both extremities. Exposure time: 8 s.
